# Supplementary material for: Low antioxidant concentrations impact on multiple signalling pathways in Arabidopsis thaliana partly through NPR1
Source: PubMed Central journal article supplement — J Exp Bot. 2012 Jan 2;63(5):1849–61. doi: 10.1093/jxb/err358 (PMC3295383; doi:10.1093/jxb/err358), 2012-01-02
Supplement: supp_err358_00064576-file001.pdf [file supp_err358_00064576-file001.pdf]

| Gene name        | AGI code  |                           |                        | Primer amplification efficiency |
|------------------|-----------|---------------------------|------------------------|---------------------------------|
| <i>LLP</i>       | At5g03350 | ATGTACCCCGGTTTTCTGG       | TCTCTTGGCACTGTTCTGGA   | 1.872                           |
| <i>Oxygenase</i> | At4g10500 | CAGAACCTACCCGTTTGTTGA     | GGTTGTTGGAGCTTTGAAGG   | 1.82                            |
| <i>PR-1</i>      | At2g14610 | TGATCATGCATACACACGTACA    | CATCCTGCATATGATGCTCCT  | 1.72                            |
| <i>PR-2</i>      | At3g57260 | GCAATGCAGAACATCGAGAA      | TCATCCCTGAACCTTCCTTG   | 1.784                           |
| <i>PAD3</i>      | At3g26830 | GATGTTCCCTGCGAAAACACA     | GTTTTGGATCACGACCCATC   | 1.69                            |
| <i>MDHAR3</i>    | At3g09940 | GACGTGTTATCCGAGGAAGG      | GACCCAATGTCTCAAAGAGAGG | 1.884                           |
| <i>SAG13</i>     | At2g29350 | GAGTTCACTCTCCGGATGGA      | GCCAACTAGTCTGCCGTCAA   | 1.652                           |
| <i>VSP1</i>      | At5g24780 | AATGGGCTGATTTGGTTGAG      | TGGATACAAGGGGACAATGC   | 1.839                           |
| <i>PDF1.2</i>    | At5g44420 | CCAAACATGGATCATGCAAC      | CACACGATTTAGCACCAAAGA  | 1.698                           |
| <i>LOX4</i>      | At1g72520 | CTAGCCGTAGGAATCGCTGT      | TACACGTAACACCCGGTCA    | 1.85                            |
| <i>TAT3</i>      | At2g24850 | ATGATCGTCATGCCATCTCC      | TGTGGACTTGTGGCATAGGA   | 1.841                           |
| <i>SAG21</i>     | At4g02380 | TGGGTAATGATCTGGTGCA       | GAGGAAACCAAACGCTTCTC   | 1.879                           |
| <i>TIP41</i>     | At4g34270 | GTGAAAACCTGTTGGAGAGAAGCAA | TCAACTGGATACCCTTTTCGCA | 1.913                           |
